# Supplementary material for: Bioactive Coatings with Ag-Camphorimine Complexes to Prevent Surface Colonization by the Pathogenic Yeast Candida albicans
Source: MDPI journal article supplement (doi:10.3390/antibiotics10060638), 2021-05-26
Supplement: s1 [file s1]

# Bioactive coatings with Ag-camphorimine complexes to prevent surface colonization by the pathogenic yeast *Candida albicans*

M. Joana F. Pinheiro <sup>1</sup>, Joana P. Costa <sup>2</sup>, Fernanda Marques <sup>3</sup>, Nuno P. Mira <sup>1,\*</sup>, M. Fernanda N. N. Carvalho <sup>2,\*</sup>, Marta M. Alves <sup>2,\*</sup>

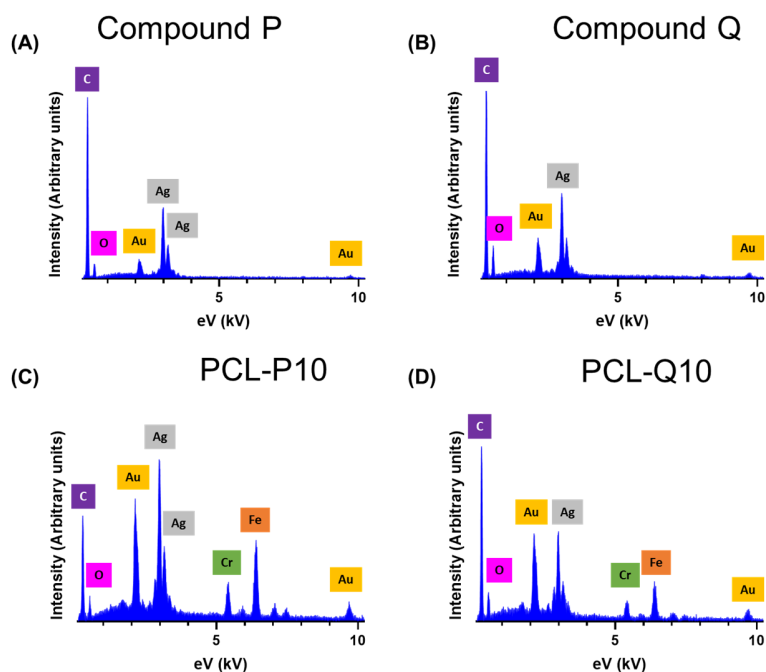

**Figure S1** – Chemical characterization of compounds P and Q, and PCL coatings; EDS spectra of compound P (A) and Q (B), and of PCL-P10 (C) and PCL-Q10 (D) coatings.

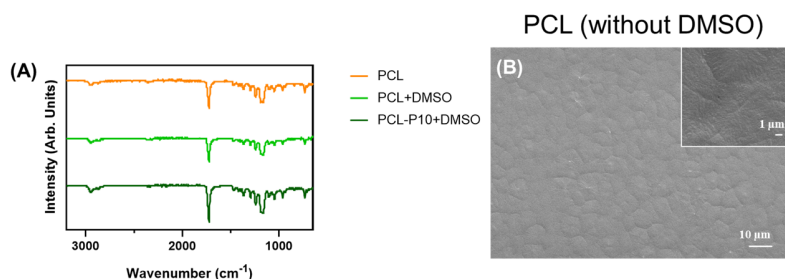

**Figure S2** – Physicochemical characterization of PCL coatings using chloroform; Attenuated total reflectance-Fourier transform infrared (ATR-FTIR) spectra of PCL, PCL with dimethyl sulfoxide (DMSO) and PCL with DMSO and compound P (10x MIC) (A); SEM micrographs of the PCL coating without DMSO in the coating formulation (B).
